# Supplementary material
Source: PubMed Central journal article supplement (PMC2634205)
Supplement: psb0205_0333SD1.pdf [file psb0205_0333SD1.pdf]

## Research Paper

# Phototropin Mediated Relocation of Myosins in *Arabidopsis Thaliana*

Weronika Krzeszowiec

Halina Gabrys<sup>1\*</sup>

Department of Plant Physiology and Biochemistry; Faculty of Biochemistry, Biophysics and Biotechnology; Jagiellonian University; Kraków, Poland

\*Correspondence to: Halina Gabrys; Department of Plant Physiology and Biochemistry; Faculty of Biochemistry, Biophysics and Biotechnology; Jagiellonian University; Gronostajowa 7; 30-387 Kraków, Poland; Tel.: +48.12.664.6340; Fax: +48.12.664.6902; Email: gabrys@mol.uj.edu.pl/  
Weronika Krzeszowiec: weronika@mol.uj.edu.pl

Original manuscript submitted: 04/10/07

Manuscript accepted: 05/21/07

This manuscript has been published online, prior to printing for Plant Signaling & Behavior, Volume 2, Issue 5. Definitive page numbers have not been assigned. The current citation is: Plant Signaling & Behavior 2007; 2(5): <http://www.landesbioscience.com/journals/psb/article/4509>

Once the issue is complete and page numbers have been assigned, the citation will change accordingly.

### KEY WORDS

Arabidopsis, blue light, chloroplast movements, myosins, phototropins

### ACKNOWLEDGEMENTS

We wish to thank Dr. Jurek Dobrucki (Division of Cell Biophysics, Faculty of Biotechnology, Jagiellonian University) for the use of the confocal microscope. We are deeply indebted to Professors Dieter Volkmann and Frantisek Baluska from Department of Plant Cell Biology, Institute of Cell Molecular Biology, University of Bonn for their kind gift of anti-plant myosin antibodies. This work was supported by grant No. PBZ/110/P04/2004 from the State Committee for Scientific Research.

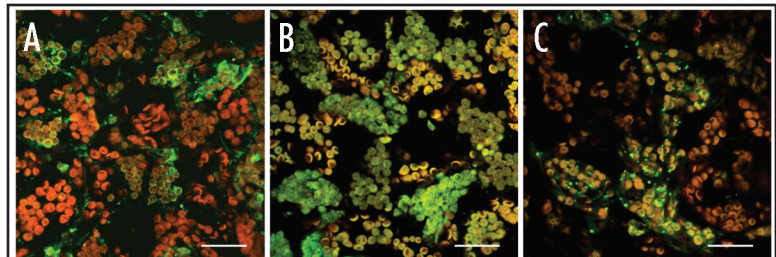

Suppl. Fig. 1. Confocal immunofluorescence images of *Arabidopsis thaliana* mesophyll, wild type plants. Myosins are labeled with anti-rabbit (Smooth and Skeletal) antibodies and with secondary FITC-conjugated antibodies (yellow-green color). Red-orange colour comes from chloroplast autofluorescence. Arrangements of myosins in the dark-adapted tissue (A), weak blue light-irradiated tissue (B), strong blue light-irradiated tissue (C). The bars are 30 µm.

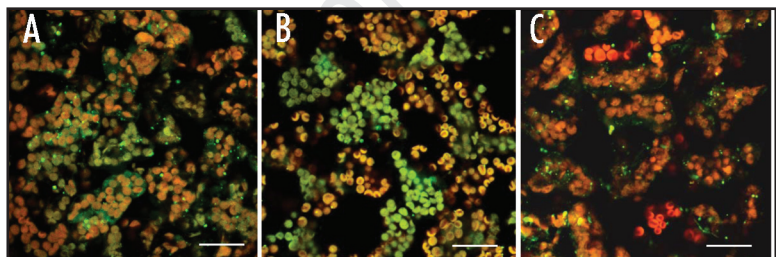

Suppl. Fig. 2 Confocal immunofluorescence images of *Arabidopsis thaliana* mesophyll, *phot1* mutant plants. Myosins are labeled with anti-rabbit (Smooth and Skeletal) antibodies and with secondary FITC-conjugated antibodies (yellow-green color). Red-orange colour comes from chloroplast autofluorescence. Arrangements of myosins in the dark-adapted tissue (A), weak blue light-irradiated tissue (B), strong blue light-irradiated tissue (C). The bars are 30 µm.

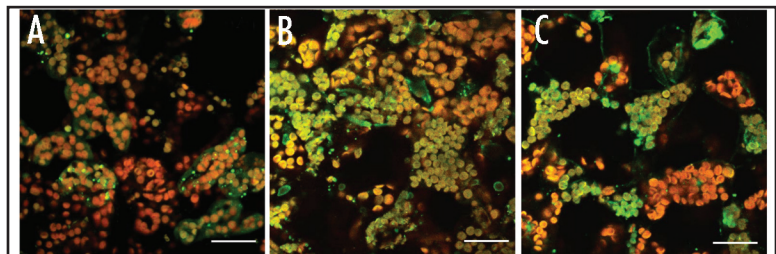

Suppl. Fig. 3 Confocal immunofluorescence images of *Arabidopsis thaliana* mesophyll, *phot2* mutant plants. Myosins are labeled with anti-rabbit (Smooth and Skeletal) antibodies and with secondary FITC-conjugated antibodies (yellow-green color). Red-orange colour comes from chloroplast autofluorescence. Arrangements of myosins in the dark-adapted tissue (A), weak blue light-irradiated tissue (B), strong blue light-irradiated tissue. The bars are 30 µm.

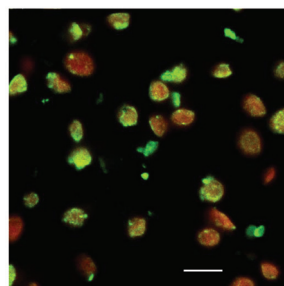

Suppl. Fig. 4. Immunofluorescent labeling of isolated chloroplasts of *Arabidopsis thaliana* wild type with anti-myosin antibodies (Smooth and Skeletal). Isolation and staining procedures according to Wojtaszek et al. 2005. The bar is 10 µm.
